# Supplementary material
Source: PubMed Central journal article supplement (PMC6309276)
Supplement: NIHMS1504978-supplement-1.pdf [file NIHMS1504978-supplement-1.pdf]

Table S1. Mean of baseline values and changes in total weekly alcohol consumption from baseline to year 1 and baseline to year 4 based on baseline alcohol consumption and year 4 alcohol consumption trajectory for participants who were assigned to intensive lifestyle intervention program (ILI) or diabetes support and education (DSE)

| Baseline Alcohol Consumption                  |              |           |          |                  |           |          |                     |          |          |                  |          |          |
|-----------------------------------------------|--------------|-----------|----------|------------------|-----------|----------|---------------------|----------|----------|------------------|----------|----------|
|                                               | <u>None</u>  |           |          | <u>Light</u>     |           |          | <u>Moderate</u>     |          |          | <u>Heavy</u>     |          |          |
|                                               | ILI          | DSE       | <i>p</i> | ILI              | DSE       | <i>p</i> | ILI                 | DSE      | <i>p</i> | ILI              | DSE      | <i>p</i> |
| Baseline                                      | 0±0          | 0±0       | ---      | 1.1±0.04         | 1.1±0.04  | 0.35     | 8.0±0.3             | 8.2±0.2  | 0.49     | 18.4±1.2         | 14.0±1.2 | 0.01     |
| Change to Year 1                              | 0±0          | 0±0       | ---      | +0.2±0.1         | +0.1±0.1  | 0.44     | -1.6±0.5            | -0.4±0.5 | 0.10     | -8.4±1.7         | -3.7±1.7 | 0.052    |
| Change to Year 4                              | +0.1±0.03    | +0.1±0.03 | 0.62     | +0.5±0.1         | +0.3±0.1  | 0.08     | -1.0±0.6            | -0.6±0.6 | 0.67     | -4.3±1.8         | -1.6±1.8 | 0.28     |
| Alcohol Consumption over 4 Years <sup>a</sup> |              |           |          |                  |           |          |                     |          |          |                  |          |          |
|                                               | Inconsistent |           |          | Consistent-Light |           |          | Consistent-Moderate |          |          | Consistent-Heavy |          |          |
|                                               | ILI          | DSE       | <i>p</i> | ILI              | DSE       | <i>p</i> | ILI                 | DSE      | <i>p</i> | ILI              | DSE      | <i>p</i> |
| Baseline                                      | 0.8±0.1      | 0.7±0.1   | 0.38     | 1.9±0.1          | 2.0±0.1   | 0.60     | 7.3±0.4             | 8.0±0.4  | 0.23     | 14.0±1.1         | 12.2±1.1 | 0.26     |
| Change to Year 1                              | -0.2±0.1     | -0.2±0.1  | 0.67     | +0.04±0.1        | -0.01±0.1 | 0.83     | +0.3±0.6            | -0.1±0.6 | 0.67     | -2.0±1.6         | +1.1±1.6 | 0.18     |
| Change to Year 4                              | -0.2±0.1     | -0.03±0.1 | 0.43     | +0.3±0.1         | +0.1±0.1  | 0.14     | +1.9±0.6            | +0.6±0.5 | 0.10     | +2.9±1.5         | +2.6±1.5 | 0.88     |

*Note.* Values shown are the mean ± SE in number of drinks per week. <sup>a</sup>Table does not show alcohol abstainers who did not drink alcohol at any time over the 4 years.

Table S2. Mean of baseline values and changes in weekly alcohol consumption from baseline to year 1 and baseline to year 4 for women and men who were assigned to intensive lifestyle intervention program (ILI) or diabetes support and education (DSE)

| Variable         | Women           |                 |         | Men             |                 |         |
|------------------|-----------------|-----------------|---------|-----------------|-----------------|---------|
|                  | ILI (n = 1,434) | DSE (n = 1,437) | p-value | ILI (n = 1,014) | DSE (n = 1,016) | p-value |
| Total alcohol    |                 |                 |         |                 |                 |         |
| Baseline         | 0.6±0.05        | 0.6±0.05        | 0.99    | 2.4±0.1         | 2.4±0.1         | 0.81    |
| Change to year 1 | -0.04±0.04      | -0.04±0.04      | 0.93    | -0.2±0.1        | +0.1±0.1        | 0.27    |
| Change to year 4 | +0.1±0.1        | +0.1±0.1        | 0.75    | +0.2±0.2        | +0.1±0.2        | 0.66    |
| Wine             |                 |                 |         |                 |                 |         |
| Baseline         | 0.6±0.1         | 0.7±0.1         | 0.67    | 1.2±0.1         | 1.3±0.1         | 0.75    |
| Change to year 1 | +0.03±0.1       | +0.1±0.1        | 0.72    | +0.2±0.1        | +0.1±0.1        | 0.34    |
| Change to year 4 | +0.2±0.1        | +0.2±0.1        | 0.36    | +0.4±0.1        | +0.2±0.1        | 0.06    |
| Beer             |                 |                 |         |                 |                 |         |
| Baseline         | 0.2±0.03        | 0.2±0.03        | 0.64    | 1.3±0.1         | 1.1±0.1         | 0.32    |
| Change to year 1 | -0.02±0.03      | -0.04±0.03      | 0.63    | -0.3±0.1        | +0.0±0.1        | 0.054   |
| Change to year 4 | +0.02±0.03      | -0.0±0.03       | 0.54    | +0.02±0.1       | -0.1±0.1        | 0.51    |

Liquor

|                  |            |           |      |           |          |      |
|------------------|------------|-----------|------|-----------|----------|------|
| Baseline         | 0.3±0.03   | 0.3±0.04  | 0.93 | 0.8±0.1   | 0.9±0.1  | 0.87 |
| Change to year 1 | -0.02±0.03 | +0.0±0.03 | 0.58 | +0.02±0.1 | +0.1±0.1 | 0.44 |
| Change to year 4 | +0.1±0.04  | +0.1±0.04 | 0.43 | +0.04±0.1 | +0.1±0.1 | 0.45 |

---

*Note.* Values shown are the mean ± SE for number of drinks per week.
